# Supplementary material for: Effects of photosymbiosis and related processes on planktic foraminifera-bound nitrogen isotopes in South Atlantic sediments
Source: Copernicus journal article supplement (doi:10.5194/bg-22-1887-2025), 2025-04-17
Supplement: Supplementary file 1 [file bg-22-1887-2025-supplement.zip]

## Sheet: Foram-bound d15N
Leg	Site	Hole	Core	Section	Top cm	Depth (mbsf)	Age (ka)	G.truncatulinoides	G.bulloides	G.siphonifera	T.sacculifer	G.ruber ruber	G.ruber albus	G.truncatulinoides	G.bulloides	G.siphonifera	T.sacculifer	G.ruber ruber	G.ruber albus
								d15N (permil vs. air)						N content (nmol/mg)
72	516	Z	1	1	2.5	0	0	8.69201	9.76496	8.74	4.66	4.02	4.47	3.72699	n/a	4.70727	4.58164	3.96614	4.46105
72	516	Z	1	1	4	0.04	3.81371	8.14603	9.33	8.99	4.54927	4.09	4.57876	3.87404	5.63	5.07	3.53422	4.4	3.62123
72	516	Z	1	1	6	0.06	8.46094	n/a	n/a	n/a	4.39535	n/a	n/a	n/a	n/a	n/a	4.28364	n/a	n/a
72	516	Z	1	1	8	0.08	13.1082	8.01268	n/a	8.98	4.19719	n/a	n/a	4.4064	n/a	4.16	4.27011	n/a	4.6244
72	516	Z	1	1	10	0.1	17.7554	n/a	n/a	n/a	4.38382	n/a	n/a	n/a	n/a	n/a	4.07243	n/a	n/a
72	516	Z	1	1	12	0.12	22.4026	8.24	9.53	9.19	4.32387	4.43546	5.24	4.46018	4.33325	4.65812	4.44727	4.12994	4.15
72	516	Z	1	1	14	0.14	27.0499	n/a	n/a	n/a	4.78	n/a	n/a	n/a	n/a	n/a	3.68	n/a	n/a
72	516	Z	1	1	16	0.16	31.6971	7.96106	9.15	n/a	4.64242	4.17	4.41622	3.56951	4.04	5.03	3.90299	4.19	3.63853
72	516	Z	1	1	18	0.18	36.3443	n/a	n/a	n/a	4.13928	n/a	n/a	n/a	n/a	n/a	4.03543	n/a	n/a
72	516	Z	1	1	20	0.2	40.9916	7.76981	8.66	8.69	3.99	3.87	4.37521	4.10443	4.2	4.88	3.49283	4.67	3.8418
72	516	Z	1	1	22	0.22	45.6388	n/a	n/a	n/a	4.02238	n/a	n/a	n/a	n/a	n/a	4.63777	n/a	n/a
72	516	Z	1	1	24	0.24	50.286	7.63	8.72	8.68573	4.26	3.71865	3.85005	4.26	4.03296	4.09992	4.25747	4.16881	3.91619
72	516	Z	1	1	27	0.27	57.2569	n/a	n/a	n/a	3.59165	n/a	n/a	n/a	n/a	n/a	3.98472	n/a	n/a
72	516	Z	1	1	28	0.28	59.5805	7.89	8.77	8.68	3.98142	3.43	4.05919	3.75794	4.09	4.61	4.91463	4.12	3.45499
72	516	Z	1	1	30	0.3	64.2277	n/a	n/a	n/a	3.84676	n/a	n/a	n/a	n/a	n/a	3.75256	n/a	n/a
72	516	Z	1	1	32	0.32	68.875	7.6568	9.1	8.17	3.62	3.45	4.33	4.11228	3.95	4.35	3.60067	5.7	4.04684
72	516	Z	1	1	34	0.34	71.9369	n/a	n/a	n/a	3.64981	n/a	n/a	n/a	n/a	n/a	4.25066	n/a	n/a
72	516	Z	1	1	36	0.36	74.3515	7.61033	9.1	8.38	3.75301	3.82	4.06227	3.41526	4.04191	4.21669	3.5363	4.35163	3.27331
72	516	Z	1	1	38	0.38	76.766	n/a	n/a	n/a	3.80508	n/a	n/a	n/a	n/a	n/a	4.10776	n/a	n/a
72	516	Z	1	1	40	0.4	79.1806	7.73704	8.99	8.54	3.79554	3.61	3.87144	3.44402	3.64	4.19	3.55754	4.48	3.45065
72	516	Z	1	1	42	0.42	81.5951	n/a	n/a	n/a	4.01313	n/a	n/a	n/a	n/a	n/a	3.91338	n/a	n/a
72	516	Z	1	1	44	0.44	84.0097	7.75963	n/a	8.09	3.56	4.09	4.18281	3.9073	5.55	4.16	3.3169	4.52	3.40973
72	516	Z	1	1	46	0.46	87.7574	n/a	n/a	n/a	3.43893	n/a	n/a	n/a	n/a	n/a	4.29432	n/a	n/a
72	516	Z	1	1	48	0.48	92.9387	7.83203	8.92479	8.28433	3.62634	3.97947	3.76195	3.64551	3.75912	4.37408	3.26121	4.62485	3.18079
72	516	Z	1	1	50	0.5	98.12	n/a	n/a	n/a	4.08604	n/a	n/a	n/a	n/a	n/a	3.98915	n/a	n/a
72	516	Z	1	1	52	0.52	103.301	8.03356	9.27	n/a	3.96946	4.17	4.21657	3.75244	3.83	4.7	3.77784	4.39	3.43862
72	516	Z	1	1	54	0.54	108.483	n/a	n/a	n/a	3.91956	n/a	n/a	n/a	n/a	n/a	3.8261	n/a	n/a
72	516	Z	1	1	56	0.56	113.664	8.06704	9.71	8.23	3.71	4.48	4.33134	3.94098	3.65	4.17	3.40877	4.68	3.45661
72	516	Z	1	1	58	0.58	118.845	n/a	n/a	n/a	4.03646	n/a	n/a	n/a	n/a	n/a	4.26301	n/a	n/a
72	516	Z	1	1	60	0.6	124.026	8.10763	9.72097	8.64	4.1165	4.67035	n/a	3.39965	3.95213	4.00727	3.70203	4.94218	3.21771
72	516	Z	1	1	62	0.62	129.208	n/a	n/a	n/a	4.52357	n/a	n/a	n/a	n/a	n/a	3.93693	n/a	n/a
72	516	Z	1	1	64	0.64	133.654	8.46499	10.12	8.9	n/a	4.7	4.60449	3.62827	3.88	4.72	5.14119	4.54	1.69457
72	516	Z	1	1	67	0.67	139.217	n/a	n/a	n/a	4.56443	n/a	n/a	n/a	n/a	n/a	4.44378	n/a	n/a
72	516	Z	1	1	68	0.68	141.071	8.36901	n/a	9.78	4.74972	4.69	4.91555	3.79015	4.08	4.36	4.0787	4.51	3.35252
72	516	Z	1	1	74	0.74	152.198	8.79194	10.0354	9.31	5.00368	4.91541	n/a	2.51203	3.55751	4.47154	4.3331	4.50532	3.12302
72	516	Z	1	1	76	0.76	155.907	8.29013	9.64	9.52	4.633	4.42	4.49781	3.58126	3.75	4.04	2.98712	4.45	3.38232
72	516	Z	1	1	80	0.8	163.324	7.97447	9.6	9.12	4.25138	3.88	4.53172	3.7954	3.87	n/a	4.17954	4.66	3.25385

## Sheet: Foram calcite d18O d13C
Leg	Site	Hole	Core	Section	Top cm	Depth (mbsf)	Age (ka)	G.truncatulinoides	G.bulloides	G.siphonifera	T.sacculifer	G.ruber ruber	G.ruber albus	G.truncatulinoides	G.bulloides	G.siphonifera	T.sacculifer	G.ruber ruber	G.ruber albus	G.truncatulinoides	G.bulloides	G.siphonifera	T.sacculifer	G.ruber ruber	G.ruber albus	G.truncatulinoides	G.bulloides	G.siphonifera	T.sacculifer	G.ruber ruber	G.ruber albus	G.truncatulinoides	G.bulloides	G.siphonifera	T.sacculifer	G.ruber ruber	G.ruber albus	G.truncatulinoides	G.bulloides	G.siphonifera	T.sacculifer	G.ruber ruber	G.ruber albus	G.truncatulinoides	G.bulloides	G.siphonifera	T.sacculifer	G.ruber ruber	G.ruber albus
								d18O (permil vs. VPDB)						d18O (permil vs. VPDB) replicate						d18O average						d18O stdev						d13C (permil vs. VPDB)						d13C (permil vs. VPDB) replicate						d13C average
72	516	Z	1	1	2.5	0	0	n/a	1.43807	0.708152	n/a	0.161747	-0.0155646	n/a	n/a	0.756369	0.0514736	0.215715	0.151257	n/a	1.43807	0.732261	0.0514736	0.188731	0.0678461	n/a	n/a	0.0340942		0.038161	0.117961	n/a	-0.473362	1.17814	1.60816	0.989836	1.33888	n/a	n/a	1.20653	1.89139	1.30014	1.17057	n/a	-0.473362	1.19234	1.74978	1.14499	1.25472
72	516	Z	1	1	4	0.04	3.81371	1.66169	1.77028	0.727753	-0.0293884	0.169931	0.609076	n/a	n/a	0.77023	0.299202	0.0911365	0.348407	1.66169	1.77028	0.748992	0.134907	0.130534	0.478742	n/a	n/a	0.0300356	0.232349	0.055716	0.184321	1.18152	-0.626728	1.24313	1.76455	0.90321	1.12329	n/a	n/a	1.06821	1.54482	0.980803	1.24332	1.18152	-0.626728	1.15567	1.65468	0.942006	1.1833
72	516	Z	1	1	6	0.06	8.46094	n/a	n/a	n/a	n/a	n/a	n/a	n/a	n/a	n/a	n/a	n/a	n/a	n/a	n/a	n/a	n/a	n/a	n/a	n/a	n/a	n/a	n/a	n/a	n/a	n/a	n/a	n/a	n/a	n/a	n/a	n/a	n/a	n/a	n/a	n/a	1.05232	n/a	n/a	n/a	n/a	n/a	1.05232
72	516	Z	1	1	8	0.08	13.1082	1.86566	1.59022	0.995901	0.257074	-0.258997	0.346604	n/a	n/a	0.928283	n/a	-0.0519739	0.235513	1.86566	1.59022	0.962092	0.257074	-0.155486	0.291059	n/a	n/a	0.0478128	n/a	0.146388	0.0785533	1.12332	-0.622764	1.18209	1.26687	1.0473	0.887516	n/a	n/a	1.01064	n/a	1.34866	1.10136	1.12332	-0.622764	1.09637	1.26687	1.19798	0.99444
72	516	Z	1	1	10	0.1	17.7554	n/a	n/a	n/a	n/a	n/a	n/a	n/a	n/a	n/a	n/a	n/a	n/a	n/a	n/a	n/a	n/a	n/a	n/a	n/a	n/a	n/a	n/a	n/a	n/a	n/a	n/a	n/a	n/a	n/a	n/a	n/a	n/a	n/a	n/a	n/a	n/a	n/a	n/a	n/a	n/a	n/a	n/a
72	516	Z	1	1	12	0.12	22.4026	n/a	n/a	1.06368	0.536633	0.294611	0.317644	n/a	n/a	0.908558	0.334596	0.186253	0.545221	n/a	n/a	0.986119	0.435615	0.240432	0.431432	n/a	n/a	0.109688	0.142862	0.0766203	0.160921	n/a	n/a	1.02206	1.30113	0.949488	1.05536	n/a	n/a	1.16121	1.78104	0.928312	1.13229	n/a	n/a	1.09163	1.54109	0.9389	1.09383
72	516	Z	1	1	16	0.16	31.6971	1.95696	1.55141	1.58064	0.955274	0.434353	0.60532	n/a	n/a	1.41393	0.705461	0.723264	1.01458	1.95696	1.55141	1.49729	0.830367	0.578808	0.809948	n/a	n/a	0.117885	0.176644	0.204291	0.289387	1.17216	-1.26059	1.00554	1.50084	0.655142	0.894981	1.70247	n/a	0.902787	1.46804	1.06884	1.0257	1.43732	-1.26059	0.954163	1.48444	0.861991	0.96034
72	516	Z	1	1	18	0.18	36.3443	n/a	n/a	n/a	n/a	n/a	n/a	n/a	n/a	1.51264	n/a	0.575629	1.0252	n/a	n/a	1.51264	n/a	0.575629	1.0252	n/a	n/a	n/a	n/a	n/a	n/a	n/a	n/a	n/a	n/a	n/a	n/a	1.16307	n/a	1.16264	2.12863	1.10784	1.18413	1.16307	n/a	1.16264	2.12863	1.10784	1.18413
72	516	Z	1	1	20	0.2	40.9916	2.09973	1.54515	1.55877	0.683927	0.731228	0.677343	2.08211	1.67702	1.60114	1.19163	0.714969	1.01989	2.09092	1.61109	1.57996	0.937778	0.723099	0.848618	0.0124555	0.0932435	0.0299571	0.359001	0.011497	0.24222	1.1089	-0.551093	1.05268	1.37131	1.02184	1.05582	1.08982	-0.842016	1.10876	1.55746	1.06824	0.916678	1.09936	-0.696555	1.08072	1.46439	1.04504	0.98625
72	516	Z	1	1	22	0.22	45.6388	1.9914	1.42169	1.43281	0.932572	0.528313	0.821161	1.92306	n/a	n/a	n/a	n/a	0.987631	1.95723	1.42169	1.43281	0.932572	0.528313	0.904396	0.0483183	n/a	n/a	n/a	n/a	0.117712	1.12413	n/a	n/a	1.70954	1.32567	1.20803	1.16219	-1.01032	1.24965	n/a	n/a	1.32968	1.14316	-1.01032	1.24965	1.70954	1.32567	1.26886
72	516	Z	1	1	24	0.24	50.286	1.91273	1.24251	1.19169	0.551862	0.394114	0.731562	1.96089	1.31175	1.10547	0.881461	0.632589	0.732255	1.93681	1.27713	1.14858	0.716662	0.513352	0.731908	0.0340491	0.0489621	0.0609618	0.233062	0.168628	0.000489487	1.14577	-0.40333	1.17959	1.45297	0.838149	0.888446	1.16454	-1.08912	1.00052	1.61489	1.12074	1.0204	1.15516	-0.746226	1.09006	1.53393	0.979443	0.954425
72	516	Z	1	1	28	0.28	59.5805	1.97349	1.49814	1.11816	0.60493	0.428347	0.375922	1.92247	1.36117	1.12935	0.581243	0.376823	0.676681	1.94798	1.42966	1.12375	0.593086	0.402585	0.526301	0.0360736	0.0968498	0.00791399	0.0167495	0.0364332	0.212669	1.06671	-0.479024	1.29393	1.5303	0.625728	0.949159	1.06124	-0.80042	1.13956	1.22372	0.550451	1.01445	1.06397	-0.639722	1.21674	1.37701	0.58809	0.981804
72	516	Z	1	1	32	0.32	68.875	1.62111	1.0792	1.41088	0.343013	0.357975	0.656238	1.75151	1.15565	0.993056	0.496018	0.532864	0.932302	1.68631	1.11743	1.20197	0.419515	0.445419	0.79427	0.0922052	0.0540555	0.295446	0.108191	0.123665	0.195207	1.08039	-1.08486	1.14309	1.29442	0.743513	0.769266	1.1015	-0.87596	1.37637	1.49979	0.712085	0.966878	1.09094	-0.980412	1.25973	1.3971	0.727799	0.868072
72	516	Z	1	1	36	0.36	74.3515	1.82494	1.30124	0.957473	0.163711	0.307341	0.683995	1.94334	1.05388	1.13361	0.112259	0.291673	0.51682	1.88414	1.17756	1.04554	0.137985	0.299507	0.600408	0.0837268	0.174909	0.124545	0.0363818	0.0110792	0.118211	1.11826	-0.749459	1.36724	1.54394	1.11575	0.935263	0.91078	-1.21187	1.22002	1.40284	1.10277	1.19484	1.01452	-0.980662	1.29363	1.47339	1.10926	1.06505
72	516	Z	1	1	40	0.4	79.1806	2.00322	0.998893	1.00354	0.163012	0.26277	0.257284	1.63839	1.06742	0.947717	0.0561703	0.374825	0.374821	1.8208	1.03316	0.97563	0.109591	0.318798	0.316052	0.257978	0.0484539	0.039475	0.0755488	0.0792347	0.0831111	1.0788	-0.496457	1.12655	1.5659	1.09572	0.970885	1.11025	-0.777548	1.19829	1.55211	0.91205	1.05479	1.09453	-0.637003	1.16242	1.559	1.00388	1.01284
72	516	Z	1	1	44	0.44	84.0097	1.84561	1.36212	n/a	0.0202645	0.0124912	0.353649	n/a	n/a	n/a	n/a	n/a	n/a	1.84561	1.36212	n/a	0.0202645	0.0124912	0.353649	n/a	n/a	n/a	n/a	n/a	n/a	1.23228	-0.267531	n/a	1.21257	0.977343	1.12321	n/a	n/a	n/a	n/a	n/a	n/a	1.23228	-0.267531	n/a	1.21257	0.977343	1.12321
72	516	Z	1	1	46	0.46	87.7574	1.91207	1.10039	1.02858	0.275733	0.143688	0.143168	n/a	n/a	n/a	n/a	n/a	n/a	1.91207	1.10039	1.02858	0.275733	0.143688	0.143168	n/a	n/a	n/a	n/a	n/a	n/a	1.08204	-1.02154	1.36285	1.30276	1.05722	0.92412	n/a	n/a	n/a	n/a	n/a	n/a	1.08204	-1.02154	1.36285	1.30276	1.05722	0.92412
72	516	Z	1	1	48	0.48	92.9387	1.78762	1.09239	0.179776	-0.00629099	0.148554	0.338026	1.59872	1.06905	0.915287	n/a	0.0232462	0.33611	1.69317	1.08072	0.547532	-0.00629099	0.0859002	0.337068	0.133577	0.016504	0.520085	n/a	0.0886062	0.00135474	0.908027	-0.553674	1.09484	1.42617	0.489266	0.972621	0.978092	-1.0574	1.20914	1.30618	0.599906	0.661188	0.943059	-0.805536	1.15199	1.36617	0.544586	0.816905
72	516	Z	1	1	52	0.52	103.301	1.68379	1.02678	0.931034	0.248927	0.312156	0.38798	1.78823	0.981907	0.746206	n/a	0.321713	0.120379	1.73601	1.00434	0.83862	0.248927	0.316934	0.254179	0.073848	0.0317297	0.130694	n/a	0.00675783	0.189223	0.723271	-1.01474	1.15525	1.38622	1.02402	0.893506	0.918425	-1.12533	1.27013	1.14762	0.454168	0.676904	0.820848	-1.07004	1.21269	1.26692	0.739095	0.785205
72	516	Z	1	1	56	0.56	113.664	1.98536	1.1607	0.966591	0.100221	0.408257	0.317409	n/a	n/a	n/a	0.368553	n/a	0.447358	1.98536	1.1607	0.966591	0.234387	0.408257	0.382383	n/a	n/a	n/a	0.18974	n/a	0.0918877	0.909105	-0.902762	1.17206	1.09761	0.758212	0.710196	1.11403	n/a	1.04623	1.33279	n/a	0.70217	1.01157	-0.902762	1.10914	1.2152	0.758212	0.706183
72	516	Z	1	1	60	0.6	124.026	1.57471	1.18024	0.815904	0.0753552	0.416747	0.187122	1.57578	1.11345	0.974693	0.495155	0.611676	0.456982	1.57525	1.14684	0.895298	0.285255	0.514211	0.322052	0.000753832	0.0472282	0.112281	0.296843	0.137835	0.19082	0.74154	-0.678444	1.01282	1.36315	0.733343	0.609105	n/a	n/a	n/a	n/a	n/a	n/a	0.74154	-0.678444	1.01282	1.36315	0.733343	0.609105
72	516	Z	1	1	64	0.64	133.654	1.63014	1.41482	0.827729	0.48418	0.675454	0.345046	n/a	n/a	0.926421	0.556458	0.704563	0.692269	1.63014	1.41482	0.877075	0.520319	0.690009	0.518657	n/a	n/a	0.0697856	0.0511079	0.0205835	0.245524	0.768267	-1.03325	1.0401	1.16433	0.826046	0.667972	n/a	n/a	1.0835	1.12363	0.948992	0.593303	0.768267	-1.03325	1.0618	1.14398	0.887519	0.630637
72	516	Z	1	1	68	0.68	141.071	2.02538	1.31951	0.889491	0.458819	0.645382	0.720515	n/a	n/a	1.02675	0.674165	0.738024	0.605717	2.02538	1.31951	0.95812	0.566492	0.691703	0.663116	n/a	n/a	0.0970562	0.152273	0.0655075	0.0811741	0.675656	-1.13774	1.2123	0.783689	0.849786	0.962162	n/a	n/a	1.04866	1.14476	0.72668	0.799874	0.675656	-1.13774	1.13048	0.964222	0.788233	0.881018
72	516	Z	1	1	74	0.74	152.198	2.03894	1.38839	1.0273	0.574405	0.555219	0.752042	n/a	1.66504	1.65423	0.855203	0.571652	0.663668	2.03894	1.52672	1.34076	0.714804	0.563436	0.707855	n/a	0.195625	0.443307	0.198554	0.01162	0.0624894	0.864333	-1.56619	1.03131	1.04022	0.798726	0.702211	n/a	-1.13333	0.989836	1.28229	1.0661	0.760398	0.864333	-1.34976	1.01057	1.16125	0.932414	0.731305
72	516	Z	1	1	76	0.76	155.907	2.01683	1.4698	1.38616	0.560072	0.405439	0.752653	n/a	1.35547	n/a	n/a	n/a	n/a	2.01683	1.41263	1.38616	0.560072	0.405439	0.752653	n/a	0.0808423	n/a	n/a	n/a	n/a	0.597892	-1.57801	0.761919	1.17525	0.664296	0.884317	n/a	0.907233	n/a	n/a	n/a	n/a	0.597892	-0.335388	0.761919	1.17525	0.664296	0.884317
72	516	Z	1	1	80	0.8	163.324	1.91144	1.61291	1.29818	0.686762	0.42962	0.573718	n/a	n/a	n/a	n/a	n/a	n/a	1.91144	1.61291	1.29818	0.686762	0.42962	0.573718	n/a	n/a	n/a	n/a	n/a	n/a	0.817677	-1.52352	0.512635	1.24319	0.541817	0.533187	n/a	n/a	n/a	n/a	n/a	n/a	0.817677	-1.52352	0.512635	1.24319	0.541817	0.533187
[truncated: 6 more columns]

## Sheet: Size-specific d18O d13C
Leg	Site	Hole	Core	Section	Top cm	Depth (mbsf)	Age (ka)	time slice	size fraction (um)	G.truncatulinoides d18O	G.truncatulinoides d18O replicate	G.truncatulinoides d18O average	G.bulloides d18O	G.bulloides d18O replicate	G.bulloides d18O average	G.siphonifera d18O	G.siphonifera d18O replicate	G.siphonifera d18O average	T.sacculifer d18O	T.sacculifer d18O replicate	T.sacculifer d18O average	G.ruber ruber d18O	G.ruber ruber d18O replicate	G.ruber ruber d18O average	G.ruber albus d18O	G.ruber albus d18O replicate	G.ruber albus d18O average	G.truncatulinoides d13C	G.truncatulinoides d13C replicate	G.truncatulinoides d13C average	G.bulloides d13C	G.bulloides d13C replicate	G.bulloides d13C average	G.siphonifera d13C	G.siphonifera d13C replicate	G.siphonifera d13C average	T.sacculifer d13C	T.sacculifer d13C replicate	T.sacculifer d13C average	G.ruber ruber d13C	G.ruber ruber d13C replicate	G.ruber ruber d13C average	G.ruber albus d13C	G.ruber albus d13C replicate	G.ruber albus d13C average
72	516	Z	1	1	14	0.14	27.0499	time slice 1	200-250	1.45856	n/a	1.45856	1.14183	n/a	1.14183	1.0406	n/a	1.0406	0.747729	n/a	0.747729	0.413116	n/a	0.413116	0.638335	n/a	0.638335	0.372245	n/a	0.372245	-1.0551	n/a	-1.0551	0.693294	n/a	0.693294	0.949644	n/a	0.949644	0.718405	n/a	0.718405	0.316271	n/a	0.316271
72	516	Z	1	1	14	0.14	27.0499	time slice 1	250-315	1.84176	1.84427	1.84301	1.50711	n/a	1.50711	1.18698	n/a	1.18698	0.540772	n/a	0.540772	0.411338	n/a	0.411338	0.711762	n/a	0.711762	0.721873	1.24853	0.985201	-0.917117	n/a	-0.917117	0.941379	n/a	0.941379	1.34449	n/a	1.34449	1.05294	n/a	1.05294	0.795398	n/a	0.795398
72	516	Z	1	1	14	0.14	27.0499	time slice 1	315-400	1.8663	1.98967	1.92799	n/a	n/a	n/a	1.14661	1.18707	1.16684	0.253589	0.467006	0.360297	0.198669	0.2101	0.204385	0.677324	0.762674	0.719999	0.886823	1.10006	0.993443	n/a	n/a	n/a	1.0133	1.26459	1.13895	1.61971	1.6851	1.65241	1.26306	1.17391	1.21849	0.906947	1.01777	0.962356
72	516	Z	1	1	14	0.14	27.0499	time slice 1	>400	1.67924	n/a	1.67924	n/a	n/a	n/a	1.10345	1.2043	1.15388	0.437964	n/a	0.437964	0.110921	0.19339	0.152156	0.384722	0.483229	0.433975	1.3502	n/a	1.3502	n/a	n/a	n/a	0.878456	1.02855	0.953501	1.65863	n/a	1.65863	1.64578	1.25563	1.45071	1.58799	1.19622	1.39211
72	516	Z	1	1	62	0.62	129.208	time slice 2	200-250	1.34628	n/a	1.34628	0.985888	n/a	0.985888	0.912502	n/a	0.912502	0.349689	n/a	0.349689	0.26471	n/a	0.26471	0.59393	0.59393	0.59393	0.399371	n/a	0.399371	-1.38766	n/a	-1.38766	0.716972	n/a	0.716972	0.342212	n/a	0.342212	0.217021	n/a	0.217021	0.257422	n/a	0.257422
72	516	Z	1	1	62	0.62	129.208	time slice 2	250-315	1.81943	1.75508	1.78725	1.07005	n/a	1.07005	0.936895	n/a	0.936895	0.29437	n/a	0.29437	0.263508	n/a	0.263508	0.36579	0.36579	0.36579	0.655102	0.73464	0.694871	-1.21012	n/a	-1.21012	1.07045	n/a	1.07045	1.09574	n/a	1.09574	0.684083	n/a	0.684083	0.739955	n/a	0.739955
72	516	Z	1	1	62	0.62	129.208	time slice 2	315-400	1.57151	n/a	1.57151	n/a	n/a	n/a	0.966923	1.04997	1.00845	0.177311	0.0412484	0.10928	0.549693	n/a	0.549693	0.289425	n/a	0.289425	1.22743	1.81462	1.52102	n/a	n/a	n/a	1.20568	1.20025	1.20297	1.2432	1.32806	1.28563	1.1553	n/a	1.1553	1.02355	n/a	1.02355
72	516	Z	1	1	62	0.62	129.208	time slice 2	>400	1.49781	n/a	1.49781	n/a	n/a	n/a	0.981979	n/a	0.981979	0.129374	n/a	0.129374	0.531436	0.405738	0.468587	0.430077	0.430077	0.430077	1.0486	n/a	1.0486	n/a	n/a	n/a	1.24012	1.22397	1.23204	2.09452	1.66402	1.87927	1.25332	1.20722	1.23027	0.65102	n/a	0.65102
								average time slice 1 + 2	200-250			1.40242			1.06386			0.976551			0.548709			0.338913			0.616132			0.385808			-1.22138			0.705133			0.645928			0.467713			0.286846
								average time slice 1 + 2	250-315			1.8145			1.28858			1.06194			0.417571			0.337423			0.538776			0.840036			-1.06362			1.00592			1.22012			0.868513			0.767677
								average time slice 1 + 2	315-400			1.71891			n/a			1.08764			0.234789			0.377039			0.504712			1.25723			n/a			1.17096			1.46902			1.18689			0.992951
								average time slice 1 + 2	>400			1.58853			n/a			1.06793			0.283669			0.310371			0.432026			1.1994			n/a			1.09277			1.76895			1.34049			1.02156

## Sheet: Foram-bound d15N compilation
Location	Short ID in Figs.5, S5 and Table S2	Latitude	Longitude	Reference	G.ruber albus d15N	G.ruber ruber d15N	T.sacculifer d15N	O.universa d15N	G.menardii d15N	N.dutertrei d15N	G.siphonifera d15N	G.tumida d15N	G.hirsuta d15N	G.inflata d15N	G.truncatulinoides d15N	G.bulloides d15N	average dinoflagellate-bearing species	offset G.ruber albus	offset O.universa	offset T.sacculifer	offset G.menardii	offset N.dutertrei	offset G.siphonifera	offset G.tumida	offset G.hirsuta	offset G.inflata	offset G.truncatulinoides	offset G.bulloides
BATS		31.73	-64.08	Smart et al., 2018	2.66			2.27	3.13	4.46			4.41	4.71	5.12		2.465	0.195	-0.195	n/a	0.665	1.995	n/a	n/a	1.945	2.245	2.655	n/a
Great Bahama Banks		24.3	-79.2	Ren et al., 2012	2.87		2.31	2.64	3.54	3.82	4.11						2.60667	0.263333	0.0333333	-0.296667	0.933333	1.21333	1.50333	n/a	n/a	n/a	n/a	n/a
Barbuda-Antiqua		17.5	-61	Ren et al., 2012	2.3		2.8	3.6									2.9	-0.6	0.7	-0.1	n/a	n/a	n/a	n/a	n/a	n/a	n/a	n/a
ODP 1090		-42.91	8.9	Martínez-García et al., 2014				3.29								6.69	3.29	n/a	n/a	n/a	n/a	n/a	n/a	n/a	n/a	n/a	n/a	3.4
DSDP 516		-30.28	-35.29	this study	4.52	4.06	4.53				8.87				8.42	9.55	4.37	0.15	n/a	0.16	n/a	n/a	4.5	n/a	n/a	n/a	4.05	5.18
Indonesia		-6.8	117	Ren et al., 2012	5.07		4.55		7.1	6.74	6.82						4.81	0.26	n/a	-0.26	2.29	1.93	2.01	n/a	n/a	n/a	n/a	n/a
Cariaco Basin		10.5	-64.7	Schiebel et al., 2018	4.6		4.8	5.2									4.86667	-0.266667	0.333333	-0.0666667	n/a	n/a	n/a	n/a	n/a	n/a	n/a	n/a
Hawaii		20.8	-157.3	Ren et al., 2012	4.71		5.04										4.875	-0.165	n/a	0.165	n/a	n/a	n/a	n/a	n/a	n/a	n/a	n/a
RC13-184TW	eq. Atlantic 3	3.87	-43.3	Schiebel et al., 2018	5.03		5.66	4.27									4.98667	0.0433333	-0.716667	0.673333	n/a	n/a	n/a	n/a	n/a	n/a	n/a	n/a
South China Sea		12.7	119.5	Ren et al., 2012	5.05		5.04	4.91	6.13	5.2	7.43						5	0.05	-0.09	0.04	1.13	0.2	2.43	n/a	n/a	n/a	n/a	n/a
Bill-22	eq. Atlantic 2	7	-49.5	Schiebel et al., 2018	4.73		5.3	4.99									5.00667	-0.276667	-0.0166667	0.293333	n/a	n/a	n/a	n/a	n/a	n/a	n/a	n/a
Cariaco Basin		10.7	-64.7	Ren et al., 2012	5.07		4.84	5.5	5.64	6.25	7.1					6.98	5.13667	-0.0666667	0.363333	-0.296667	0.503333	1.11333	1.96333	n/a	n/a	n/a	n/a	1.84333
14MC: 0-8	eq. Pacific a	-0.22	204.04	Costa et al., 2016	5.00535		6.12893					8.34845					5.56714	-0.561791	n/a	0.561791	n/a	n/a	n/a	2.78131	n/a	n/a	n/a	n/a
V30-36TW	eq. Atlantic 9	5.35	-27.32	Schiebel et al., 2018	6.7		6	4.15									5.61667	1.08333	-1.46667	0.383333	n/a	n/a	n/a	n/a	n/a	n/a	n/a	n/a
V25-60TW	eq. Atlantic 4	3.28	-34.83	Schiebel et al., 2018	5.9		5.95	5.52									5.79	0.11	-0.27	0.16	n/a	n/a	n/a	n/a	n/a	n/a	n/a	n/a
V25-75TW	eq. Atlantic 1	8.58	-53.17	Schiebel et al., 2018	5.06		6.78	5.62									5.82	-0.76	-0.2	0.96	n/a	n/a	n/a	n/a	n/a	n/a	n/a	n/a
V22-38TW	eq. Atlantic 7	-9.55	-34.25	Schiebel et al., 2018	6.92		5.68	6.06									6.22	0.7	-0.16	-0.54	n/a	n/a	n/a	n/a	n/a	n/a	n/a	n/a
RC13-189TW	eq. Atlantic 8	1.87	-30	Schiebel et al., 2018	6.12		6.39	6.69									6.4	-0.28	0.29	-0.01	n/a	n/a	n/a	n/a	n/a	n/a	n/a	n/a
V25-56TW	eq. Atlantic 6	-3.55	-34.23	Schiebel et al., 2018	6.7		6.71	6.26									6.55667	0.143333	-0.296667	0.153333	n/a	n/a	n/a	n/a	n/a	n/a	n/a	n/a
21MC: 0-8	eq. Pacific b	1.27	202.74	Costa et al., 2016	6.00129		7.19836					8.45378					6.59982	-0.598538	n/a	0.598538	n/a	n/a	n/a	1.85396	n/a	n/a	n/a	n/a
V25-59TW	eq. Atlantic 5	1.37	-33.48	Schiebel et al., 2018	6.29		7.02	6.79									6.7	-0.41	0.09	0.32	n/a	n/a	n/a	n/a	n/a	n/a	n/a	n/a
29MC: 0-8	eq. Pacific d	2.97	200.8	Costa et al., 2016	6.58558		6.85422					8.80284					6.7199	-0.134318	n/a	0.134318	n/a	n/a	n/a	2.08294	n/a	n/a	n/a	n/a
26MC: 0-8	eq. Pacific c	2.46	200.61	Costa et al., 2016			6.98888					9.16723					6.98888	n/a	n/a	n/a	n/a	n/a	n/a	2.17835	n/a	n/a	n/a	n/a
New Zealand		-36.4	176.7	Ren et al., 2012	7.11			7.19			8.56				9.37		7.15	-0.04	0.04	n/a	n/a	n/a	1.41	n/a	n/a	n/a	2.22	n/a
V30-40TW	eq. Atlantic 10	-0.2	-23.15	Schiebel et al., 2018	7.78		7.44	7.12									7.44667	0.333333	-0.326667	-0.00666667	n/a	n/a	n/a	n/a	n/a	n/a	n/a	n/a
V22-182TW	eq. Atlantic 12	-0.55	-17.27	Schiebel et al., 2018	8.21		7.6	7.33									7.71333	0.496667	-0.383333	-0.113333	n/a	n/a	n/a	n/a	n/a	n/a	n/a	n/a
V30-41TW	eq. Atlantic 11	0.22	-23.07	Schiebel et al., 2018	7.36		6.61	9.64									7.87	-0.51	1.77	-1.26	n/a	n/a	n/a	n/a	n/a	n/a	n/a	n/a
ODP 662		-1.38	-11.78	Auderset et al., 2024			8.27			9.48							8.27	n/a	n/a	n/a	n/a	1.21	n/a	n/a	n/a	n/a	n/a	n/a
San Pedro Basin		33.5	-118	Ren et al., 2012				8.36		10.14						11.6	8.36	n/a	n/a	n/a	n/a	1.78	n/a	n/a	n/a	n/a	n/a	3.24
33MC: 0-8	eq. Pacific e	5.2	199.57	Costa et al., 2016	8.67929		9.57128					10.825					9.12528	-0.445993	n/a	0.445993	n/a	n/a	n/a	1.69976	n/a	n/a	n/a	n/a
39MC: 0-8	eq. Pacific f	6.83	198.96	Costa et al., 2016	11.0273		11.4979					13.328					11.2626	-0.235344	n/a	0.235344	n/a	n/a	n/a	2.06539	n/a	n/a	n/a	n/a
