# Supplementary material for: Effects of photosymbiosis and related processes on planktic foraminifera-bound nitrogen isotopes in South Atlantic sediments
Source: Copernicus journal article supplement (doi:10.5194/bg-22-1887-2025), 2025-04-17
Supplement: Supplementary file 1 [file bg-22-1887-2025-supplement.zip]

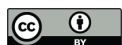

*Supplement of*

**Effects of photosymbiosis and related processes on planktic foraminifera-bound nitrogen isotopes in South Atlantic sediments**

**Alexandra Auderset et al.**

*Correspondence to:* Alexandra Auderset (a.auderset@soton.ac.uk)

- [bg-22-1887-2025-supplement-title-page.pdf](#)
- [Supplementary Data.xlsx](#)
- [egusphere-2024-2291-supplement-version2.pdf](#)

The copyright of individual parts of the supplement might differ from the article licence.
